# Supplementary material for: USP38 Couples Histone Ubiquitination and Methylation via KDM5B to Resolve Inflammation
Source: Adv Sci (Weinh). 2020 Oct 11;7(22):2002680. doi: 10.1002/advs.202002680 (PMC7675183; doi:10.1002/advs.202002680)
Supplement: Supplementary file 1 — Supporting Information [file ADVS-7-2002680-s001.pdf]

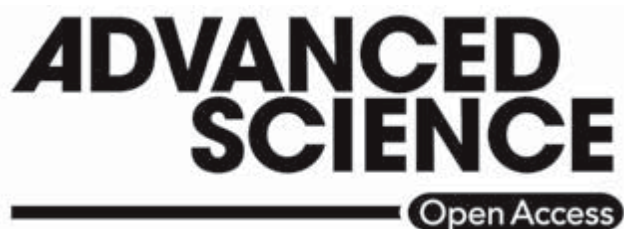

## Supporting Information

for *Adv. Sci.*, DOI: 10.1002/advs.202002680

### USP38 couples histone ubiquitination and methylation via KDM5B to resolve inflammation

Zhiyao Zhao<sup>1,2</sup>, Zexiong Su<sup>1</sup>, Puping Liang<sup>1</sup>, Di Liu<sup>1</sup>, Shuai Yang<sup>1</sup>, Yaoxing Wu<sup>1</sup>, Ling Ma<sup>1</sup>, Junyan Feng<sup>1</sup>, Xiya Zhang<sup>1</sup>, Chenglei Wu<sup>1</sup>, Junjiu Huang<sup>1</sup>,  
Jun Cui<sup>1,\*</sup>

## Supporting Information

### USP38 couples histone ubiquitination and methylation via KDM5B to resolve inflammation

*Zhiyao Zhao<sup>1,2</sup>, Zexiong Su<sup>1</sup>, Puping Liang<sup>1</sup>, Di Liu<sup>1</sup>, Shuai Yang<sup>1</sup>, Yaoxing Wu<sup>1</sup>, Ling Ma<sup>1</sup>, Junyan Feng<sup>1</sup>, Xiya Zhang<sup>1</sup>, Chenglei Wu<sup>1</sup>, Junjiu Huang<sup>1</sup> and Jun Cui<sup>1\*</sup>*

<sup>1</sup> MOE Key Laboratory of Gene Function and Regulation, State Key Laboratory of Biocontrol, School of Life Sciences, Sun Yat-sen University, Guangzhou, Guangdong, 510006, China

<sup>2</sup> Department of Internal Medicine, Guangzhou Institute of Pediatrics, Guangzhou Women and Children's Medical Center. Guangzhou, Guangdong, 510623, China

\*Correspondence should be addressed to J.C. ([cuij5@mail.sysu.edu.cn](mailto:cuij5@mail.sysu.edu.cn))

## Contents of supporting information

Supplementary Figure 1-6

Extended experimental procedures

**Figure S1**

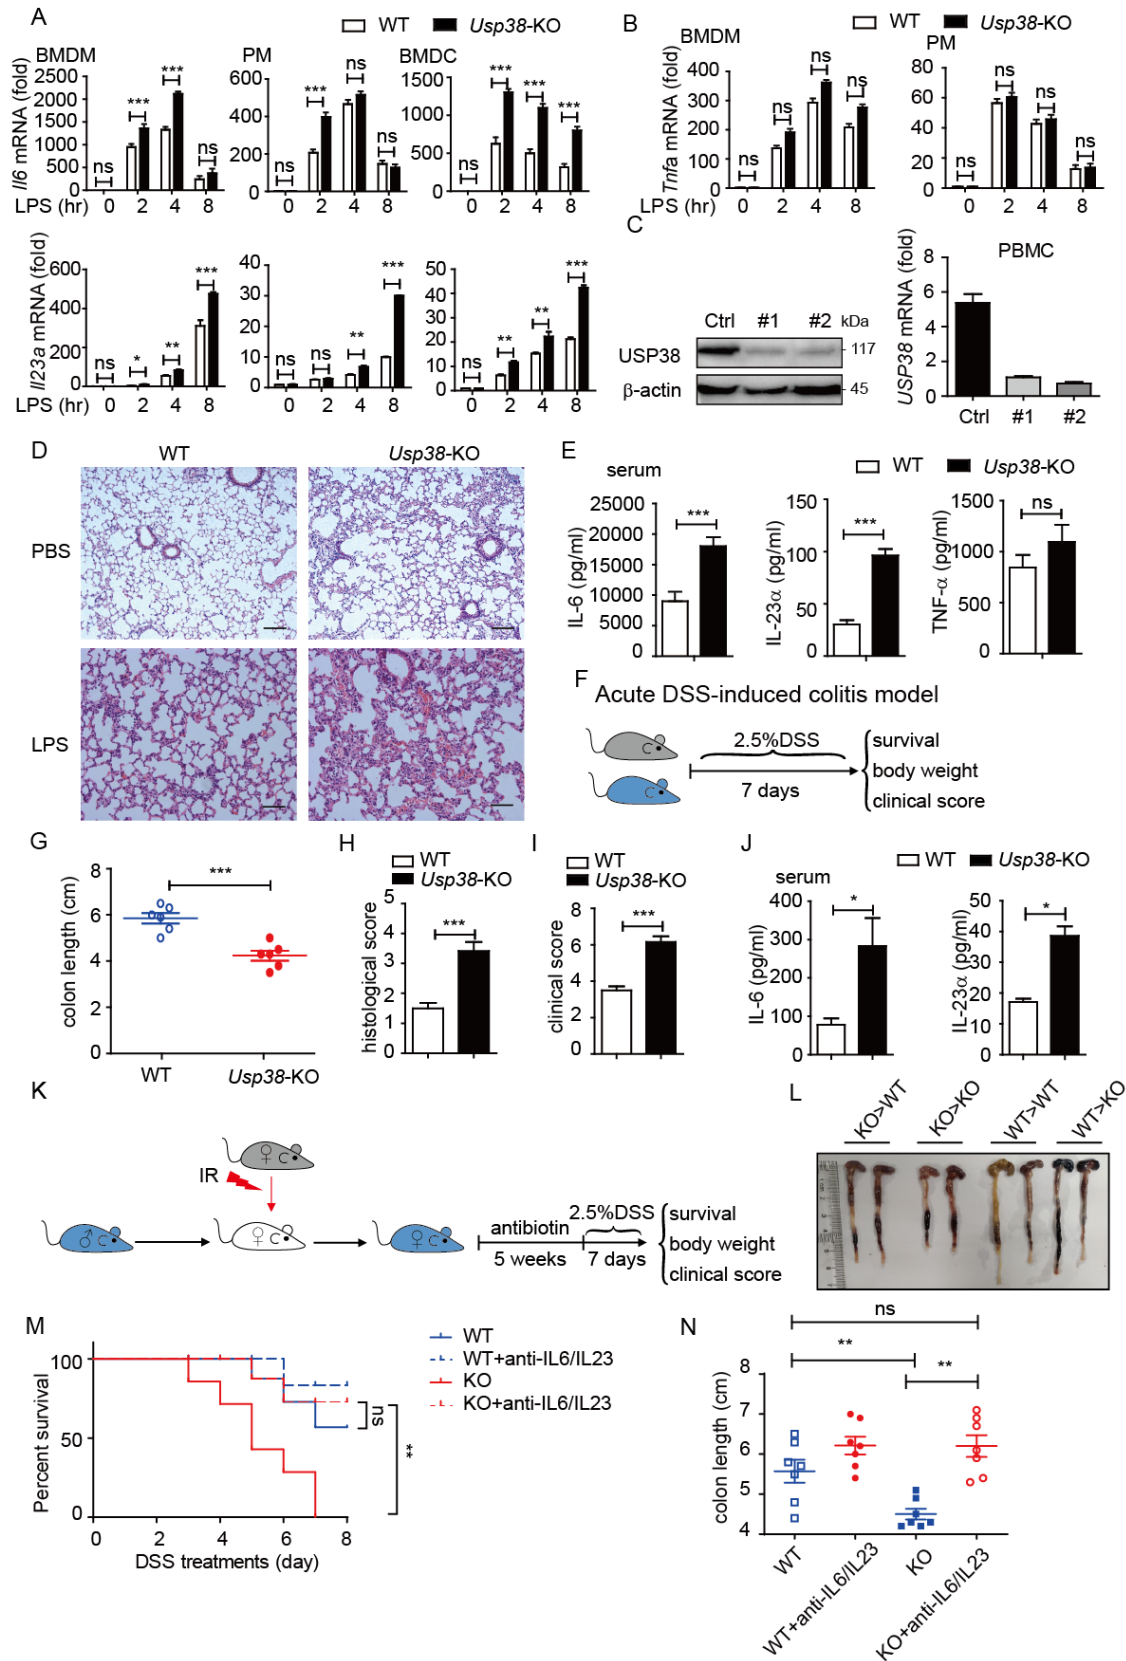

**Figure S1, Loss of USP38 maintains a higher inflammatory response.** (A) Expression levels of *Il6* and *Il23a* mRNA in BMDMs and PMs from WT and *Usp38*-KO mice during LPS stimulation for the indicated time points. (B) Expression level of *Tnfa* in BMDMs and PMs from WT and *Usp38*-KO mice during LPS stimulation for the indicated time points. (C) Knockdown efficiency of *USP38* by *USP38*-specific siRNAs was evaluated by qPCR and immunoblotting in PBMCs. (D) Histopathology of lungs from WT or *Usp38*-KO mice after intraperitoneal injection of LPS (10 mg/kg body weight) for 18 hr. Scale bars, 20  $\mu$ m. (E) Protein levels of IL-6 and TNF- $\alpha$  in serum from WT or *Usp38*-KO mice after intraperitoneal injection with LPS (10 mg/kg body weight) for 4 hr. (F) Schematic illustration of the dextran sulfate sodium (DSS)-induced acute colitis model. (G-I) Colon length (G), histological score (H) and clinical score (I) of WT and *Usp38*-KO mice of acute colitis. (J) Protein levels of IL-6 and IL-1 $\beta$  in serum from (G). (K) Schematic illustration of the construction of bone marrow chimera mice. (L) The colon length present in DSS-induced colitis from chimera mice. (M-N) Survival (M) and colon length changes (N) in WT and *Usp38*-KO mice followed with anti-IL6/IL-23 Abs (1mg/kg) treatment. n=7.

Data in A-C are presented as the means  $\pm$  SEM of at least three biological experiments. Data in E, G-J, N are presented as the means  $\pm$  SD of the experiment with six/seven mice per group. Data in D and L are representative of 3 independent biological experiments. \* $p < 0.05$ , \*\* $p < 0.01$ , \*\*\* $p < 0.001$ , ns, no significant difference, versus the wild-type or control group with the same treatment (Student's *t*-test in A-C, E, H-J, N and Mantel-Cox test and Gehan-Breslow-Wilcoxon test in M).

**Figure S2**

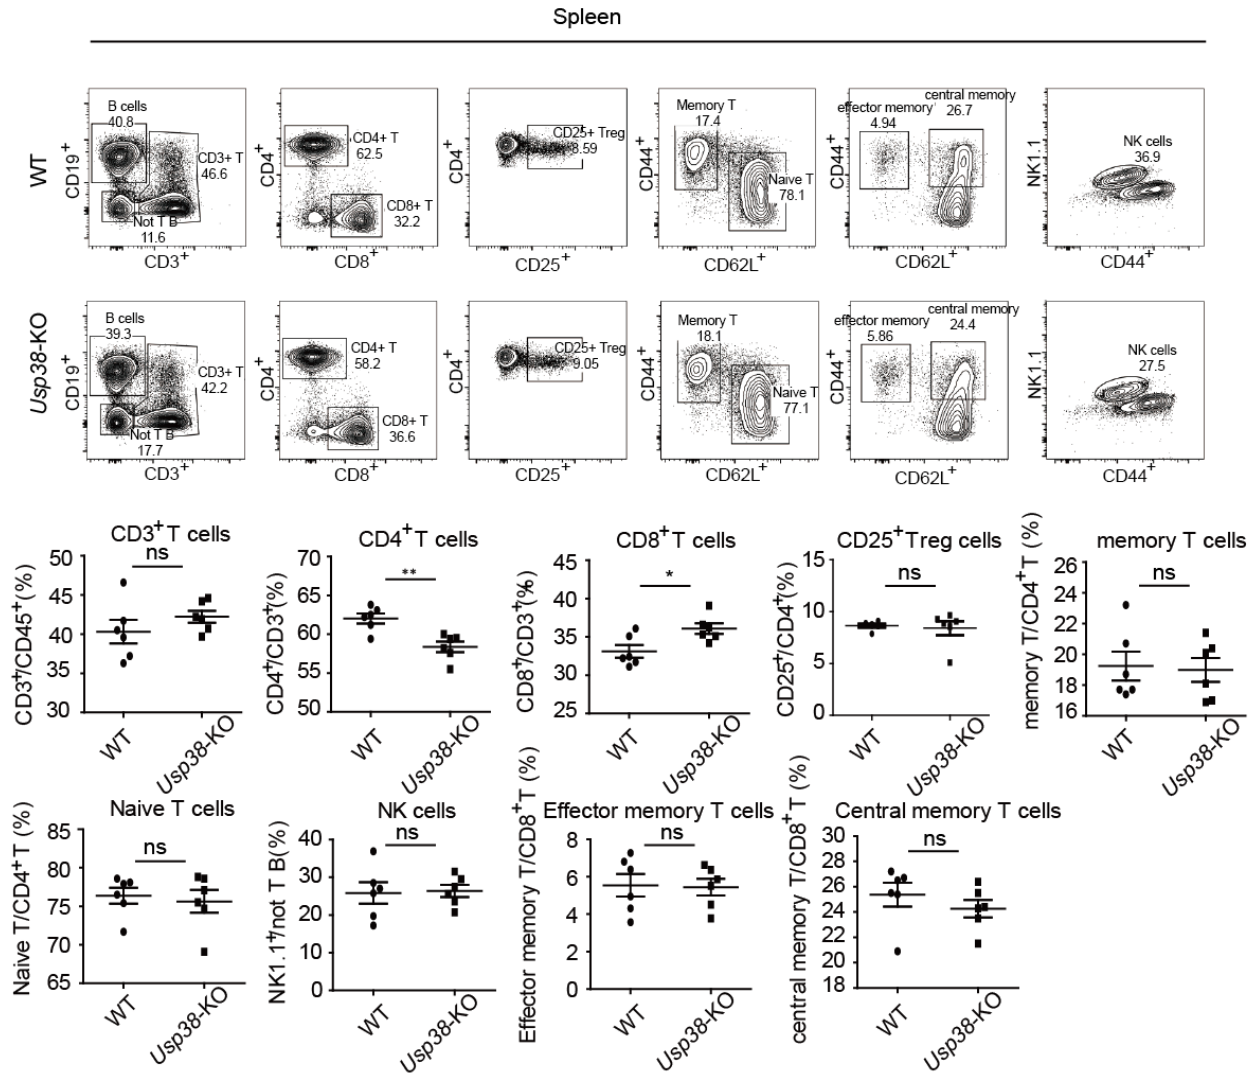

**Figure S2, Loss of USP38 has limited effects on the development of T cells.** The percentages of the indicated T cells were analyzed by their specific lineage markers from WT and *Usp38-KO* mice. Data are presented as the means  $\pm$  SD of the experiment with six mice per group. \* $p < 0.05$ , \*\* $p < 0.01$ , ns, no significant difference, versus the WT group (Student's *t*-test).

**Figure S3**

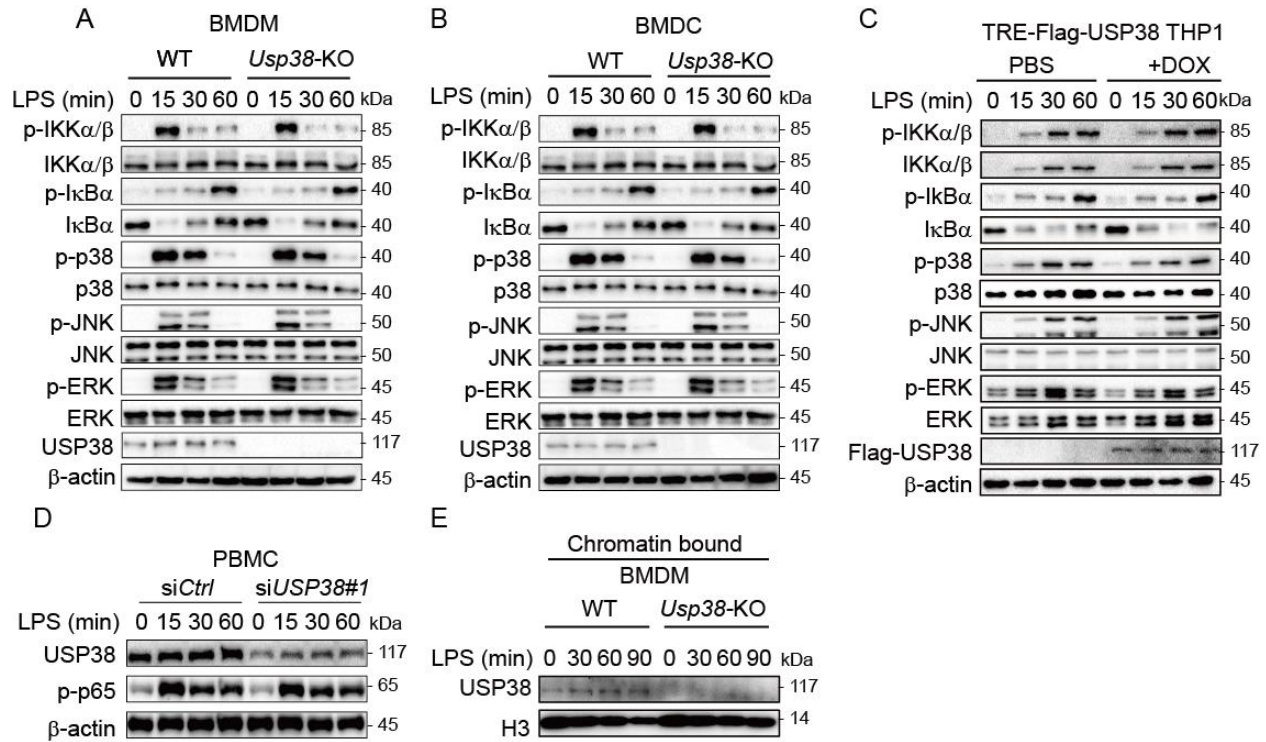

**Figure S3, USP38 is dispensable for the TLR-stimulated signaling cascade. (A-B)**

Immunoblot analysis of phosphorylated (p-) and total proteins in whole-cell lysates of WT and *Usp38*-KO BMDMs (**A**) and BMDCs (**B**) that were stimulated with LPS for the indicated time points. (**C**) Immunoblot analysis of phosphorylated (p-) and total protein in whole-cell lysates of USP38-inducible THP1 cells with or without DOX that were stimulated with LPS for the indicated time points. (**D**) Immunoblot analysis of phosphorylated p65 in PBMCs silenced with control siRNA (siCtrl) or *USP38*-specific siRNA (siUSP38) under LPS treatment for the indicated time points. (**E**) Immunoblot analysis of USP38 in the chromatin-bound and unbound components of WT and *Usp38*-KO BMDMs under LPS treatment for the indicated time points. Data are representative of 3 independent biological experiments.

**Figure S4**

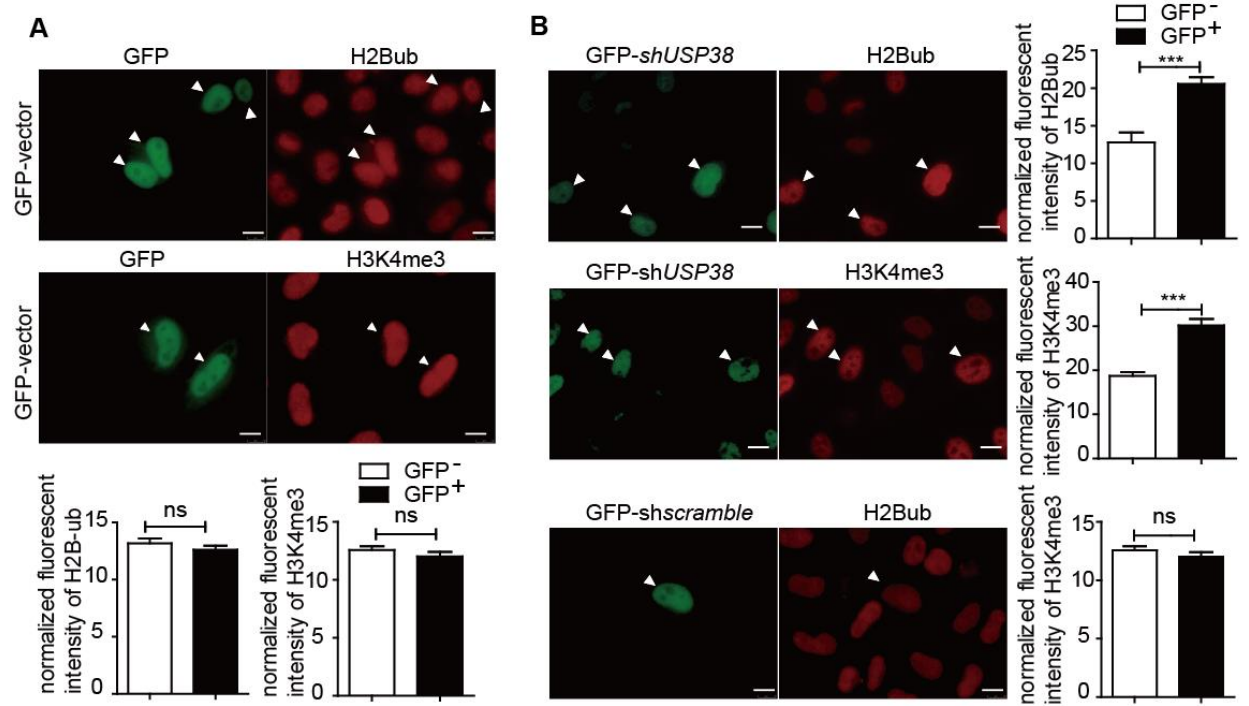

**Figure S4, USP38 specifically reduces the mono-ubiquitination of H2B and tri-methylation of H3K4.** (A) Immunofluorescence analysis of H2Bub and H3K4me3 with GFP-vector in HeLa cells. The same experiments were performed three times. The relative intensity of fluorescence signals of H2Bub and H3K4me3 in GFP vector-transfected cells (GFP<sup>+</sup>) vs. control cells (GFP<sup>-</sup>) in the same image frame and were analyzed by ImageJ software (NIH). (B) Immunofluorescence analysis of H2BK120ub and H3K4me3 with *USP38*-silenced *USP38*-specific shRNA or with *shscramble* RNA (with GFP as a marker in the same plasmid) in HeLa cells. The same experiments were performed three times. The relative intensity of fluorescence signals of H2Bub and H3K4me3 in shRNA-transfected cells (GFP<sup>+</sup>) vs. control cells (GFP<sup>-</sup>) in the same image frame and were analyzed by ImageJ software (NIH). Data in A-B are presented as the means  $\pm$  SEM of at least three independent biological experiments with 50 cells/experiment. \*\*\* $p < 0.001$ , ns, no significant difference, versus the control cells (Student's *t*-test).

[illegible]

(A) Immunoblot analysis of KDM5B and USP38 in *Kdm5b*-silenced BMDMs with *Kdm5b*-specific siRNAs (*siKdm5b#1*, *siKdm5b#2*) or control siRNA (*siCtrl*). (B) The level of *Tnfa* mRNA in WT BMDMs transfected with or without *Kdm5b*-specific siRNAs under LPS treatment for the indicated time points. (C) The levels of *Il6*, *Il23a* and *Tnfa* mRNA in WT or *Usp38*-KO BMDMs with *Kdm5b*-specific siRNA or control siRNA under LPS stimulation for the indicated time points. Data in A are representative of 3 independent biological experiments. Data in B-C are presented as the means  $\pm$  SEM of at least three independent biological experiments. \* $p < 0.05$ , \*\* $p < 0.01$ , \*\*\* $p < 0.001$ , ns, no significant difference, versus the indicated group with the same treatment (Student's *t*-test).

**Figure S6**

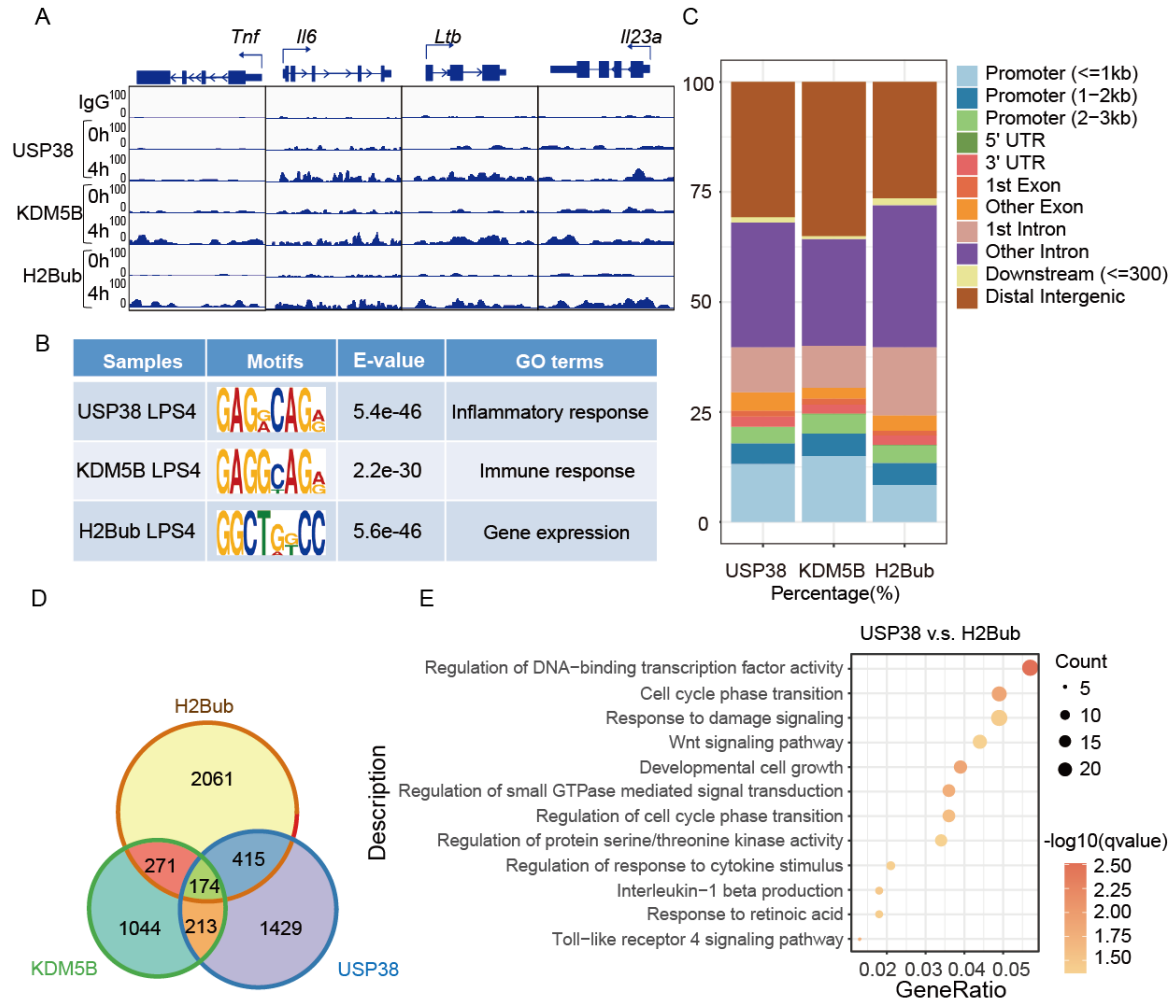

**Figure S6, USP38 and KDM5B chromatin association and H2Bub enrichment during LPS stimulation.** (A) IGV browser tracks show the distribution of USP38, KDM5B and H2Bub ChIP-seq signals at indicated loci in BMDMs with or without LPS stimulation for 4 hours. IgG was added for quality control. (B) Sequence motif identified within top enriched genes regulated by USP38, KDM5B and H2Bub, followed with GO terms analysis. (C) Genome-wide compartment analysis of ChIP-seq of USP38, KDM5B and H2Bub in genome-wide peak distribution. (D) Overlap of enriched genes targeted by USP38, KDM5B and H2Bub in BMDMs. (E) Gene Ontology enrichment analysis performed on common USP38-H2Bub targets.

## **EXTENDED EXPERIMENTAL PROCEDURES**

### **Cell culture**

HEK 293T, THP-1 cells, human peripheral blood mononuclear cells (PBMCs), bone marrow derived macrophages (BMDMs), and bone-marrow derived dendritic cells (BMDCs) were cultivated in Dulbecco's modified Eagle's medium (HyClone) or RPMI-1640 medium (Gibco) supplemented with 10% fetal bovine serum (GenStar) and 1% L-glutamine (Gibco) at 37°C in 5% CO<sub>2</sub>.

### **Reagents**

Expression plasmids were transfected with StarFect High-efficiency Transfection Reagent (GenStar) according to the manufacturer's instruction. Puromycin (P9620), MG132 (C-2211-5MG) (10μM), bafilomycin A1 (H2714) (0.2mM), and 3-methyladenine (3-MA) (M9281-100MG) (10μM), lipopolysaccharides (LPS, L4391-1MG), cycloheximide from microbial (CHX, C1988-1g) were purchased from Sigma.

### **Antibodies**

Anti-c-Myc-HRP (11814150001) were purchased from Roche Applied Science. Anti-H2B (12364S), anti-H2A (12349S), K48-linkage Specific Polyubiquitin antibody (4289) were purchased from CST. Anti-H3K4me3 (A2357) was purchased from Abclonal. Anti-H3K9me3 (61013) was purchased from Active motif. Anti-H3K4me3 (A2357) was purchased from

Abclonal. Anti-Histone H3 antibody (ab1791) and anti-KDM5B (ab181089) were purchased from Abcam. Anti-USP38 antibody (17767-I-AP) was purchased from Proteintech. Anti- $\beta$ -Actin (A2228) was purchased from Sigma. CD44-FITC (11-0445-82), CD3-PE (12-0038-42), CD19-FITC (11-0193-82), CD8a-PerCP-Cyanine5.5 (45-0081-82), CD4-APC (17-0041-82), CD25-PerCP-Cyanine5.5 (45-0251-82), CD62L-PE-Cyanine7 (25-0621-82) and NK1.1- PerCP-Cyanine5.5 (45-5941-82) were purchased from eBioscience.

## **RNA Extraction and Quantitative RT-PCR**

Total RNA was isolated by TRIzol Reagent (Invitrogen). HiScript III RT SuperMix for qPCR (R323-01) was purchased from Vazyme. SYBR Green qPCR Mix (GenStar) was applied for Real-time PCR, and data were normalized to GAPDH. Primers used for real-time PCR were followed:

*mIl6* forward primer: 5' TAGTCCTTCCTACCCCAATTTC 3'

*mIl6* reverse primer: 5' TTGGTCCTTAGCCACTCCTTC 3'

*mTnfa* forward primer: 5' CCCTCACACTCAGATCATCTTCT 3'

*mTnfa* reverse primer: 5' GCTACGACGTGGGCTACAG 3'

*mIl23a* forward primer: 5'GCCAAGAAGACCATTCCCGA3'

*mIl23a* reverse primer: 5'TCAGTGCTACAATCTTCTTCAGAGGACA3'

*mIrf4* forward primer: 5'CCGACAGTGGTTGATCGACC3'

*mIrf4* reverse primer: 5'CCTCACGATTGTAGTCCTGCTT3'

*mGAPDH* forward primer: 5'GAAGGGCTCATGACCACAGT 3'

*mGAPDH* reverse primer:5' GGATGCAGGGATGATGTTCT 3'

## **Measurement of cytokines**

Concentrations of the cytokines in cell culture supernatants or mouse serum were determined by ELISA kits (BD Biosciences), according to the manufacturer's recommendations.

## **Immunoprecipitation and Immunoblotting**

For immunoprecipitation, cells were collected and digested by low salt lysis buffer (LSB, 50 mM HEPES pH 7.5, 150 mM NaCl, 1 mM EDTA, 1.5 mM MgCl<sub>2</sub>, 10% glycerol, 1% Triton X-100) plus protease inhibitors on ice for 30 minutes. Cell lysates were incubated overnight with anti-Flag or anti-Myc agarose gels (Sigma) or the appropriate antibodies plus Protein A/G beads (Pierce). Then beads were washed for 5 times with LSB and eluted with 2×SEMS Loading Buffer (Cell Signaling Technology) and detected by immune-blotting and incubated with corresponding antibodies for further analysis.

## **Immunofluorescence Staining**

Cells were washed by PBS and fixed by 4% paraformaldehyde for 15 minutes and washed with cold PBS for two times before permeabilized with methyl alcohol for 10 min at -20°C. Cells were washed with cold PBS for three times and then blocked cells in 6% goat serum for 1 hour at

room temperature. Cells were incubated with primary antibody overnight, and incubated with fluorescently labeled secondary anti-body (Alexa Fluor 488- and Alexa Fluor 568-conjugated antibodies against mouse, rabbit or goat IgG (Biotium)) for 1 hour. Nuclei were stained with DAPI (Invitrogen). Pictures were captured by Ultrahigh Resolution Confocal Laser Microscope (Leica TCS SP8 STED 3X).
